# Supplementary material
Source: HighWire-hosted journal article supplement (http://molpharm.aspetjournals.org/highwire/filestream/77362/field_highwire_adjunct_files/0/Supplemental_97915.pdf)

Supplemental Data:

cAMP dependent Protein kinase (PKA)-mediated c-Myc degradation is dependent on the relative proportion of PKA-I and PKA-II isozymes.

Qingyuan Liu, Eric Nguyen, Stein Døskeland, Évelyne Ségal-Bendirdjian

Supplemental Figure 1. 8-CPT-cAMP mediated decrease of c-Myc protein occurred as soon as 6h of treatment. NB4wt and NB4R1I $\alpha,\beta$ KD cells were cultured for 6 h in the absence or presence of 8-CPT-cAMP (200  $\mu$ M). *Upper panel:* Expression of c-Myc was analysed by Western blot followed by chemiluminescence detection. Lamin B was used as a loading control. The images are representative of results obtained from independent experiments performed three. *Lower panel:* c-Myc signals were quantified by densitometry, normalized relatively to their respective Lamin B signals and represented as percentage of c-Myc levels in the control cells. Bars in each panel represent means with error bars corresponding to S.E.M. \* p<0.05.

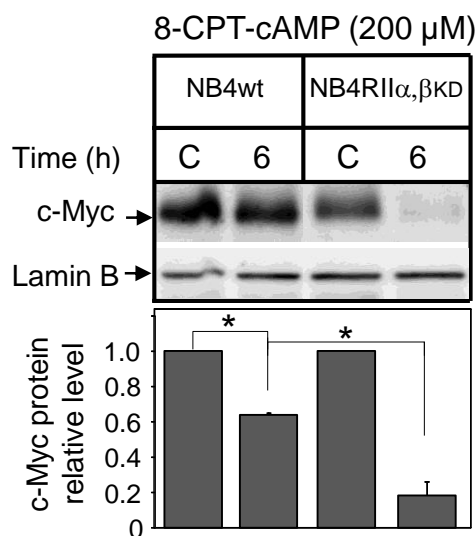

Supplement: Supplemental_97915.pdf [file Supplemental_97915.pdf]
